# Supplementary material
Source: publisher figshare collection journal article supplement (https://sage.figshare.com/ndownloader/files/36009557)
Supplement: Supplementary file 1 [file 36009557]

|  | | | **Females** | | |
| --- | --- | --- | --- | --- | --- |
| **Measurement** | **Interval** | **Statistic** | **Cambodian** | **Chinese** | **Vietnamese** |
| White Blood Cell Count  (x103 cells/µL) | Pretreatment | Mean (95% CI) | 13.39 (12.93-13.86) | 13.09 (12.81-13.38) | 12.76 (12.10-13.41) |
| SD | 3.813 | 3.870 | 3.699 |
| N | 271 | 718 | 119 |
| Median | 12.9 | 12.6 | 12.3 |
| Central 95% | 7.4-21.1 | 7.0-22.1 | 6.1-21.6 |
| Final | Mean (95% CI) | 12.65 (12.19-13.20) | 12.18 (11.92-12.42) | 12.28 (11.70-12.88) |
| SD | 3.832 | 3.469 | 3.300 |
| N | 271 | 718 | 119 |
| Median | 12.1 | 11.8 | 12.3 |
| Central 95% | 6.9-22.7 | 6.4-19.7 | 7.0-19.3 |
| Absolute Neutrophil Count  (x103 cells/µL) | Pretreatment | Mean (95% CI) | 5.870a,b (5.513-6.254) | 6.530a (6.315-6.776) | 6.808b (6.244-7.421) |
| SD | 2.9438 | 3.1252 | 3.1792 |
| N | 270 | 715 | 119 |
| Median | 5.40 | 5.83 | 6.33 |
| Central 95% | 2.15-13.27 | 2.51-14.38 | 2.59-16.71 |
| Final | Mean (95% CI) | 5.239a,b (4.971-5.517) | 5.604a,c (5.411-5.810) | 6.274b,c (5.776-6.828) |
| SD | 2.2881 | 2.7499 | 3.0569 |
| N | 265 | 713 | 119 |
| Median | 4.78 | 5.03 | 5.32 |
| Central 95% | 1.79-10.60 | 2.08-12.39 | 2.39-14.06 |
| Absolute Lymphocyte Count  (x103 cells/µL) | Pretreatment | Mean (95% CI) | 6.763a,b (6.444-7.055) | 5.845a,c (5.679-6.020) | 5.323b,c (4.985-5.643) |
| SD | 2.5490 | 2.3259 | 1.8298 |
| N | 270 | 715 | 119 |
| Median | 6.53 | 5.52 | 5.19 |
| Central 95% | 2.88-12.99 | 2.39-11.34 | 1.91-10.62 |
| Final | Mean (95% CI) | 6.528a,b (6.262-6.786) | 5.846a,c (5.678-5.996) | 5.346b,c (4.969-5.711) |
| SD | 2.1986 | 2.1314 | 2.0337 |
| N | 265 | 713 | 119 |
| Median | 6.20 | 5.62 | 5.01 |
| Central 95% | 3.20-11.13 | 2.32-10.40 | 1.99-10.87 |
| Absolute Monocyte Count  (x103 cells/µL) | Pretreatment | Mean (95% CI) | 0.411 (0.389-0.431) | 0.414 (0.401-0.427) | 0.392 (0.362-0.425) |
| SD | 0.1735 | 0.1835 | 0.1677 |
| N | 270 | 715 | 119 |
| Median | 0.39 | 0.38 | 0.36 |
| Central 95% | 0.14-0.80 | 0.16-0.94 | 0.15-0.83 |
| Final | Mean (95% CI) | 0.433 (0.410-0.456) | 0.435 (0.422-0.449) | 0.393 (0.364-0.422) |
| SD | 0.1974 | 0.1860 | 0.1635 |
| N | 265 | 713 | 119 |
| Median | 0.39 | 0.40 | 0.37 |
| Central 95% | 0.16-0.95 | 0.16-0.87 | 0.15-0.86 |
| Absolute Eosinophil Count  (x103 cells/µL) | Pretreatment | Mean (95% CI) | 0.138 (0.122-0.155) | 0.124 (0.113-0.135) | 0.111 (0.092-0.133) |
| SD | 0.1435 | 0.1492 | 0.1117 |
| N | 270 | 715 | 119 |
| Median | 0.10 | 0.08 | 0.08 |
| Central 95% | 0.01-0.58 | 0.01-0.55 | 0.01-0.47 |
| Final | Mean (95% CI) | 0.173 (0.158-0.191) | 0.158 (0.148-0.169) | 0.152 (0.129-0.176) |
| SD | 0.1405 | 0.1445 | 0.1385 |
| N | 265 | 713 | 119 |
| Median | 0.14 | 0.12 | 0.12 |
| Central 95% | 0.02-0.53 | 0.02-0.54 | 0.01-0.57 |
| Absolute Basophil Count  (x103 cells/µL) | Pretreatment | Mean (95% CI) | 0.049 (0.046-0.052) | 0.046 (0.045-0.048) | 0.045 (0.042-0.050) |
| SD | 0.0274 | 0.0261 | 0.0231 |
| N | 270 | 715 | 119 |
| Median | 0.04 | 0.04 | 0.04 |
| Central 95% | 0.01-0.12 | 0.01-0.12 | 0.01-0.11 |
| Final | Mean (95% CI) | 0.040 (0.038-0.043) | 0.042 (0.040-0.044) | 0.040 (0.036-0.044) |
| SD | 0.0232 | 0.0292 | 0.0232 |
| N | 265 | 713 | 119 |
| Median | 0.04 | 0.04 | 0.03 |
| Central 95% | 0.01-0.10 | 0.01-0.11 | 0.01-0.10 |
| Absolute Large Unstained Cell Count  (x103 cells/µL) | Pretreatment | Mean (95% CI) | 0.088 (0.082-0.093) | 0.087 (0.083-0.092) | 0.074 (0.068-0.080) |
| SD | 0.0486 | 0.0604 | 0.0352 |
| N | 270 | 715 | 119 |
| Median | 0.07 | 0.08 | 0.07 |
| Central 95% | 0.02-0.21 | 0.02-0.20 | 0.03-0.16 |
| Final | Mean (95% CI) | 0.087b (0.081-0.092) | 0.085c (0.081-0.088) | 0.069b,c (0.063-0.074) |
| SD | 0.0465 | 0.0482 | 0.0304 |
| N | 265 | 713 | 119 |
| Median | 0.08 | 0.07 | 0.06 |
| Central 95% | 0.03-0.19 | 0.03-0.19 | 0.02-0.15 |
| Red Blood Cell Count  (x106 cells/µL) | Pretreatment | Mean (95% CI) | 5.559 (5.511-5.610) | 5.550 (5.519-5.579) | 5.553 (5.485-5.621) |
| SD | 0.4126 | 0.4045 | 0.3873 |
| N | 271 | 713 | 119 |
| Median | 5.57 | 5.55 | 5.55 |
| Central 95% | 4.71-6.44 | 4.73-6.41 | 4.80-6.25 |
| Final | Mean (95% CI) | 5.417 (5.364-5.470) | 5.451c (5.417-5.484) | 5.305c (5.207-5.400) |
| SD | 0.4474 | 0.4513 | 0.5625 |
| N | 271 | 718 | 119 |
| Median | 5.44 | 5.46 | 5.33 |
| Central 95% | 4.52-6.36 | 4.53-6.32 | 4.05-6.31 |
| Hemoglobin Concentration  (g/dL) | Pretreatment | Mean (95% CI) | 13.14 (13.04-13.25) | 13.07 (13.01-13.14) | 13.19 (13.05-13.33) |
| SD | 0.867 | 0.846 | 0.772 |
| N | 271 | 714 | 119 |
| Median | 13.2 | 13.1 | 13.2 |
| Central 95% | 11.2-14.9 | 11.5-14.8 | 11.8-14.9 |
| Final | Mean (95% CI) | 12.89 (12.78-13.00) | 12.96c (12.88-13.03) | 12.65c (12.43-12.87) |
| SD | 0.964 | 1.008 | 1.182 |
| N | 271 | 718 | 119 |
| Median | 13.0 | 13.0 | 12.9 |
| Central 95% | 11.0-14.8 | 10.9-14.8 | 10.2-14.7 |
| Hematocrit  (%) | Pretreatment | Mean (95% CI) | 43.85a (43.50-44.24) | 43.06a (42.82-43.28) | 43.16 (42.69-43.63) |
| SD | 3.119 | 3.166 | 2.813 |
| N | 271 | 713 | 119 |
| Median | 43.9 | 43.0 | 42.9 |
| Central 95% | 38.1-50.7 | 37.0-49.6 | 38.5-49.7 |
| Final | Mean (95% CI) | 42.68b (42.30-43.10) | 42.49c (42.25-42.73) | 41.19b,c (40.46-41.86) |
| SD | 3.340 | 3.419 | 4.053 |
| N | 271 | 718 | 119 |
| Median | 42.9 | 42.6 | 41.5 |
| Central 95% | 35.5-49.6 | 35.6-48.9 | 31.0-47.6 |
| Absolute Reticulocyte Count  (x103 cells/µL) | Pretreatment | Mean (95% CI) | 82.28a,b (77.70-87.06) | 72.96a,c (70.61-75.19) | 65.71b,c (61.45-70.05) |
| SD | 38.326 | 29.308 | 24.264 |
| N | 269 | 700 | 118 |
| Median | 73.3 | 68.2 | 60.6 |
| Central 95% | 30.6-184.9 | 30.7-144.9 | 27.3-121.3 |
| Final | Mean (95% CI) | 74.97a (72.17-78.11) | 79.82a,c (76.92-82.64) | 69.48c (64.66-74.75) |
| SD | 26.372 | 39.508 | 29.092 |
| N | 271 | 712 | 118 |
| Median | 71.2 | 69.5 | 67.2 |
| Central 95% | 35.3-136.0 | 30.8-183.9 | 30.3-183.4 |
| Mean Corpuscular Hemoglobin  (pg) | Pretreatment | Mean (95% CI) | 23.68 (23.55-23.81) | 23.60 (23.52-23.69) | 23.80 (23.59-24.00) |
| SD | 1.065 | 1.222 | 1.177 |
| N | 271 | 713 | 119 |
| Median | 23.7 | 23.7 | 23.7 |
| Central 95% | 21.6-25.9 | 21.2-25.9 | 21.6-26.2 |
| Final | Mean (95% CI) | 23.82 (23.69-23.94) | 23.81 (23.71-23.90) | 23.91 (23.73-24.11) |
| SD | 1.087 | 1.246 | 1.146 |
| N | 271 | 718 | 119 |
| Median | 23.8 | 23.8 | 23.9 |
| Central 95% | 21.7-26.0 | 21.4-26.1 | 21.8-26.4 |
| Mean Corpuscular  Hemoglobin Concentration  (g/dL) | Pretreatment | Mean (95% CI) | 30.00a,b (29.85-30.14) | 30.41a (30.33-30.50) | 30.60b (30.39-30.80) |
| SD | 1.161 | 1.259 | 1.211 |
| N | 271 | 713 | 119 |
| Median | 30.0 | 30.4 | 30.7 |
| Central 95% | 28.0-32.3 | 27.8-32.7 | 27.8-32.8 |
| Final | Mean (95% CI) | 30.23a,b (30.09-30.36) | 30.52a,c (30.43-30.61) | 30.76b,c (30.56-30.97) |
| SD | 1.131 | 1.233 | 1.160 |
| N | 271 | 718 | 119 |
| Median | 30.2 | 30.5 | 30.7 |
| Central 95% | 28.1-32.5 | 28.1-32.9 | 28.4-33.1 |
| Mean Corpuscular Volume  (fL) | Pretreatment | Mean (95% CI) | 79.00a,b (78.55-79.45) | 77.69a (77.39-78.00) | 77.82b (77.20-78.44) |
| SD | 3.927 | 4.241 | 3.654 |
| N | 271 | 713 | 119 |
| Median | 79.0 | 77.7 | 77.9 |
| Central 95% | 71.5-87.6 | 69.9-86.4 | 69.4-84.6 |
| Final | Mean (95% CI) | 78.89a,b (78.48-79.32) | 78.06a (77.76-78.35) | 77.77b (77.16-78.39) |
| SD | 3.654 | 3.941 | 3.653 |
| N | 271 | 718 | 119 |
| Median | 78.8 | 78.1 | 77.8 |
| Central 95% | 72.3-86.7 | 70.6-86.2 | 70.4-85.5 |
| Red Blood Cell Distribution Width  (%) | Pretreatment | Mean (95% CI) | 12.97 (12.88-13.07) | 12.88 (12.81-12.95) | 12.70 (12.49-12.92) |
| SD | 0.814 | 0.805 | 0.574 |
| N | 271 | 559 | 27 |
| Median | 12.9 | 12.8 | 12.7 |
| Central 95% | 11.5-14.9 | 11.5-14.7 | 11.8-14.0 |
| Final | Mean (95% CI) | 12.79 (12.71-12.88) | 12.75 (12.69-12.82) | 12.77 (12.58-12.98) |
| SD | 0.702 | 0.760 | 0.628 |
| N | 271 | 582 | 33 |
| Median | 12.8 | 12.7 | 12.8 |
| Central 95% | 11.5-14.3 | 11.5-14.5 | 11.6-14.3 |
| Platelet Count  (x103 cells/µL) | Pretreatment | Mean (95% CI) | 428.7 (417.9-439.8) | 424.2 (417.6-431.2) | 429.7 (414.6-444.3) |
| SD | 90.28 | 92.93 | 83.89 |
| N | 271 | 713 | 119 |
| Median | 422 | 415 | 433 |
| Central 95% | 266-609 | 258-636 | 271-585 |
| Final | Mean (95% CI) | 411.4 (401.0-422.0) | 420.8 (414.0-428.0) | 418.8 (403.7-432.6) |
| SD | 89.13 | 96.81 | 80.67 |
| N | 271 | 718 | 119 |
| Median | 403 | 410 | 416 |
| Central 95% | 264-584 | 259-644 | 281-589 |
| * 95% CI generated via non-parametric bootstrap resampling, n = 1000  aCambodian-Chinese mean pairwise comparison statistically significant  bCambodian-Vietnamese mean pairwise comparison statistically significant  cChinese-Vietnamese mean pairwise comparison statistically significant | | | | | |
